# Supplementary material
Source: publisher figshare collection journal article supplement (https://rs.figshare.com/ndownloader/files/13574105)
Supplement: Supplementary file 1 [file 13574105]

## A-Amylase immobilization on amidoximated acrylic microfibers activated by cyanuric chloride

Yaaser Q. Almulaiky<sup>1,2</sup>, Faisal M. Aqlan<sup>3</sup>, Musab Aldhahri<sup>4,5</sup>, Mohammed Baeshen<sup>6</sup> Tariq Jamal Khan<sup>7</sup>, Khalid A. Khan<sup>8</sup>, Mohamed Afifi<sup>6,9</sup>, Ammar AL-Farga<sup>1</sup>, Mohiuddin Khan Warsi<sup>1</sup>, Mohammed Alkaled<sup>6</sup>, Aisha A.M. Alayafi<sup>6</sup>

<sup>1</sup>Department of Biochemistry, Faculty of Science, University of Jeddah, Jeddah, Saudi Arabia

<sup>2</sup>Chemistry Department, Faculty of Applied Science, Taiz University, Taiz, Yemen

<sup>3</sup>Chemistry Department, Faculty of Science, University of Jeddah, Jeddah, Saudi Arabia

<sup>4</sup>Department of Biochemistry, Faculty of Science, King Abdulaziz University, Jeddah, Saudi Arabia

<sup>5</sup>Center of Nanotechnology, King Abdulaziz University, Jeddah, Saudi Arabia

<sup>6</sup>Department of biology, Faculty of Science, University of Jeddah, Jeddah, Saudi Arabia

<sup>7</sup>Stem Cell P2 Laboratory, The Center for Reproductive Medicine, Shantou University Medical College, Shantou, 515041, People's Republic of China

<sup>8</sup>Chemistry Department, Faculty of Science, King Abdulaziz University, Jeddah, Saudi Arabia

<sup>9</sup>Biochemistry Department, Faculty of Veterinary Medicine, Zagazig University, Egypt

### Supplementary Figure 1

| Time hour | Residual activity % | OD at 560nm (n/3) |
|-----------|---------------------|-------------------|
| 4         | 37                  | 0.277             |
| 8         | 61                  | 0.458             |
| 12        | 84                  | 0.630             |
| 16        | 85                  | 0.634             |
| 20        | 85                  | 0.629             |
| 24        | 85                  | 0.631             |

**Supplementary Figure 1** Effect of immobilization time on the relative activity of the immobilized  $\alpha$ -amylase. The effect of immobilization time was carried out by determining the activity of enzyme after immobilization in different time. a 1cm<sup>2</sup> section of acrylic fabric was used to determine the activity of immobilized enzyme on activated acrylic microfibers. The immobilized  $\alpha$ -amylase was incubated at 37 °C for 30 min with 1 ml of starch (1%), 1ml of 50 mM sodium acetate buffer 5.5; 1 ml of dinitrosalicylic acid (DNS) reagent was used. The immobilized enzyme was removed from the reaction mixture and washed with distilled water before added DNS reagent.
